# Supplementary material
Source: PubMed Central journal article supplement (PMC3446683)
Supplement: mmc1.pdf [file mmc1.pdf]

**Coarse-graining provides insights on the essential  
nature of heterogeneity in actin filaments**

**Supplemental Information**

Jun Fan, Marissa G. Saunders, and Gregory A. Voth\*

*Department of Chemistry, Institute for Biophysical Dynamics, James Franck  
Institute, and Computation Institute, University of Chicago, 5735 S Ellis  
Ave., Chicago, IL 60637*

\*Corresponding author: Email: [gavoth@uchicago.edu](mailto:gavoth@uchicago.edu)

## SUPPLEMENTARY TEXT

### Essential Dynamics Coarse-Graining

The ED-CG method is described mathematically as the following: The displacement of atom  $i$  at time  $t$  can be determined to be  $\Delta r_i(t) = r_i(t) - \bar{r}_i$ , where  $r_i(t)$  is the location of atom  $i$  at time  $t$ , and  $\bar{r}_i$  is the equilibrium position of atom  $i$ . Correlation between atoms is evaluated based on whether the two atoms move together. If atom  $i$  and atom  $j$  are correlated then the displacement difference,  $|\Delta r_i(t) - \Delta r_j(t)|^2$ , will be small. To correctly capture the slow motions of the system, instead of calculating the displacement difference using  $\Delta r_i(t)$ , we transform the atomistic coordinates into the essential subspace in which only the lowest frequency principle components are retained (1). In this subspace, the displacements are denoted  $\Delta r_i^{ED}(t)$ . For a system of  $n$  atoms, the mapping of these atoms to  $N_{CG}$  coarse-grained sites will optimally capture long timescale correlations between atoms when the residual

$$\chi^2 = \frac{1}{3N_{CG}} \sum_{l=1}^{N_{CG}} \frac{1}{n_l} \sum_{t=1}^{n_t} \left( \sum_{i \in l} \sum_{j > i \in l} |\Delta r_i^{ED}(t) - \Delta r_j^{ED}(t)| \right) \quad (1)$$

is minimized. In the CG representation, the position of a CG site is given by the center of mass (COM) of all the atoms belonging to this CG site. Using this representation, MD simulation data can be transformed into CG coordinates.

### The Hetero-Elastic Network Model method

In this method, the interaction between each pair of CG atoms is represented by a harmonic spring. The equilibrium distance is the average distance between each CG pair

$\bar{x}_{ij} = \overline{|x_i - x_j|}$ , and the corresponding mean-square distance fluctuation is given by  $\Delta x_{ij}^2 = \overline{(x_{ij} - \bar{x}_{ij})^2}$ . The spring constant  $k_{ij}$  is obtained by matching the mean-square

distance fluctuation of CG sites, calculated from the normal-mode analysis ( $\Delta x_{ij,NMA}^2$ ), with that from the MD simulations ( $\Delta x_{ij,MD}^2$ ) through the following iterative algorithm:

$$\frac{1}{k^{m+1}} = \frac{1}{k^m} - 4\alpha(\Delta x_{ij,NMA}^2 - \Delta x_{ij,MD}^2), \quad (2)$$

where  $m$  indicates the iteration. The normal mode analysis of the CG elastic network was performed with CHARMM version c32b2 (2). No distance cutoff was imposed to limit the interactions, thus for a system with  $N_{CG}$  CG sites, HENM would yield  $N_{CG}(N_{CG}-1)/2$  spring constants. Initial values of the spring constants were set at 1 kcal/molÅ<sup>2</sup> and iterations of Eq. (2) continued until  $|k_{ij}^{m+1} - k_{ij}^m| \leq 10^{-3}$ .

### Twist angle per subunit

Each subunit was CG into a point by calculating its center of mass (COM). The COM of each strand was fitted into a smooth curve using the cubic spline function of MATLAB. The projection of monomer  $i$  onto the other strand  $i'$  is defined by the point of the other strand with equal curvilinear distance to monomer  $i-1$  and monomer  $i+1$ . A third curve, connected by the center point of  $i$  and  $i'$ , denoted by  $i''$ , is the twist axis. The angle between vector  $i-i''$  and vector  $(i+1)-(i+1)''$  projected to the plane with the norm direction along the vector  $i''-(i+1)''$  is the twist angle of monomer  $i+1$  reference to monomer  $i$ .

### Calculation of the free energy of CG models

For each CG system, the free energy could be calculated analytically by

$$G = H - TS, \quad (3)$$

where the enthalpy

$$H = \sum_{i,j=1}^{N_{CG}} \frac{1}{2} k_{ij} (x_{ij} - \bar{x}_{ij})^2 + \sum_i \frac{1}{2} m_i v_i^2 + \sum_{i=1}^{3N_{CG}-6} \left( \frac{1}{2} N_A \hbar v_i + \frac{N_A \hbar v_i e^{-\hbar v_i / k_B T}}{1 - e^{-\hbar v_i / k_B T}} \right) \quad (4)$$

contains the bonding energy ( $V$ ) of all CG pairs, the kinetic energy, and the vibrational contribution.  $N_A$  is Avogadro's number,  $v_i$  is the  $i^{\text{th}}$  frequency of the normal mode of the system,  $k_B$  is Boltzmann constant,  $T$  is temperature, and the entropy

$$S = \sum_{i=1}^{3N_{CG}-6} [-R \ln(1 - e^{-\hbar v_i / k_B T}) + \frac{N_A \hbar v_i e^{-\hbar v_i / k_B T}}{T(1 - e^{-\hbar v_i / k_B T})}] \quad (5)$$

based on Normal Mode Analysis (3). For harmonic systems, according to equipartition theorem, the bonding energy and the kinetic energy are both  $3/2N_{CG}RT$ . The vibration frequency  $v_i$  is the square root of the eigenvalue of the mass-weighted Hessian Matrix  $\sqrt{M}^{-1}H\sqrt{M}^{-1}$ , where  $M$  is mass and  $H \in R^{3n} \times R^{3n}$  is the Hessian Matrix

$$H = \begin{bmatrix} h_{11} & h_{12} & \cdots & h_{1n} \\ h_{21} & h_{22} & \cdots & h_{2n} \\ \vdots & & & \vdots \\ h_{n1} & h_{n2} & \cdots & h_{nn} \end{bmatrix}. \quad (6)$$

The term  $h_{ij} \in R^3 \times R^3$  is a super-element in H. The super-elements are given by

$$h_{ij} = \begin{bmatrix} \partial^2 V / \partial x_{i_1} \partial x_{j_1} & \partial^2 V / \partial x_{i_1} \partial x_{j_2} & \partial^2 V / \partial x_{i_1} \partial x_{j_3} \\ \partial^2 V / \partial x_{i_2} \partial x_{j_1} & \partial^2 V / \partial x_{i_2} \partial x_{j_2} & \partial^2 V / \partial x_{i_2} \partial x_{j_3} \\ \partial^2 V / \partial x_{i_3} \partial x_{j_1} & \partial^2 V / \partial x_{i_3} \partial x_{j_2} & \partial^2 V / \partial x_{i_3} \partial x_{j_3} \end{bmatrix}, \quad (7)$$

when  $i \neq j$

$$\partial^2 V / \partial x_{i_1} \partial x_{j_2} = -k_{ij} \frac{(x_{j_1} - x_{i_1})(x_{j_2} - x_{i_2})}{x_{ij}^2} \Big|_{x_{ij} = \bar{x}_{ij}}, \quad (8)$$

and when  $i = j$

$$\partial^2 V / \partial x_{i_1} \partial x_{i_2} = \sum_{l \neq i} k_{il} \frac{(x_{i_1} - x_{l_1})(x_{i_2} - x_{l_2})}{x_{il}^2} \Big|_{x_{il} = \bar{x}_{il}}. \quad (9)$$

## SUPPLEMENTAL TABLES AND FIGURES

Table S1. Intra-subunit CG interactions for 4 intuitive sites model (ATP-bound filament)

| Intra-subunit pairs | $\bar{x}_{ij}$<br>(Å) | $\bar{k}_{ij}$<br>(kcal/molÅ <sup>2</sup> ) | $\sigma(k_{ij})$<br>(kcal/molÅ <sup>2</sup> ) | $\sigma(k_{ij})/\bar{k}_{ij}$ |
|---------------------|-----------------------|---------------------------------------------|-----------------------------------------------|-------------------------------|
| 1-2                 | 26.80 (0.56)          | 2.68                                        | 1.23                                          | 45.9%                         |
| 1-3                 | 25.93 (0.31)          | 8.31                                        | 1.89                                          | 22.7%                         |
| 1-4                 | 35.76 (0.66)          | 4.54                                        | 1.31                                          | 28.9%                         |
| 2-3                 | 39.64 (0.56)          | 3.04                                        | 1.53                                          | 50.3%                         |
| 2-4                 | 29.20 (1.26)          | 2.93                                        | 1.47                                          | 50.2%                         |
| 3-4                 | 25.18 (0.22)          | 9.75                                        | 3.05                                          | 31.3%                         |

**Figure S1** Changes in the morphology of the D-loop (circled) alter the contacts between subunits along a strand in the filament. Each frame shows the ending configuration of a different subunit. Note that the bottom subunit in (a) has a folded D-loop configurations while in all other subunits D-loop are unfolded. This figure shows that distinct configurations are coupled with different contacts.

**Figure S2** Diagrammatic representation of the 13 six-site CG configurations of the (a) ATP-bound and (b) ADP-bound filament and the averaged six-site CG model superimposed on the all-atom backbone structure. The top row contains the 1<sup>st</sup> -5<sup>th</sup> subunits, the middle row contains subunits 6 -10, and bottom row contains subunits 11 - 13 and the averaged model.

**Figure S3** Incorporating heterogeneity into CG models better reproduces (a) the persistence length and (b) torsional stiffness observed in MD simulations for ADP-bound filament.

**Figure S4** Incorporating heterogeneity into CG models better represents (a) the twist per subunit and (b) its distribution observed in MD simulations for ADP-bound filament.

**Figure S1** Changes in the morphology of the D-loop (circled) alter the contacts between subunits along a strand in the filament. Each frame shows the ending configuration of a different subunit. Note that the bottom subunit in (a) has a folded D-loop configurations while in all other subunits D-loop are unfolded. This figure shows that distinct configurations are coupled with different contacts.

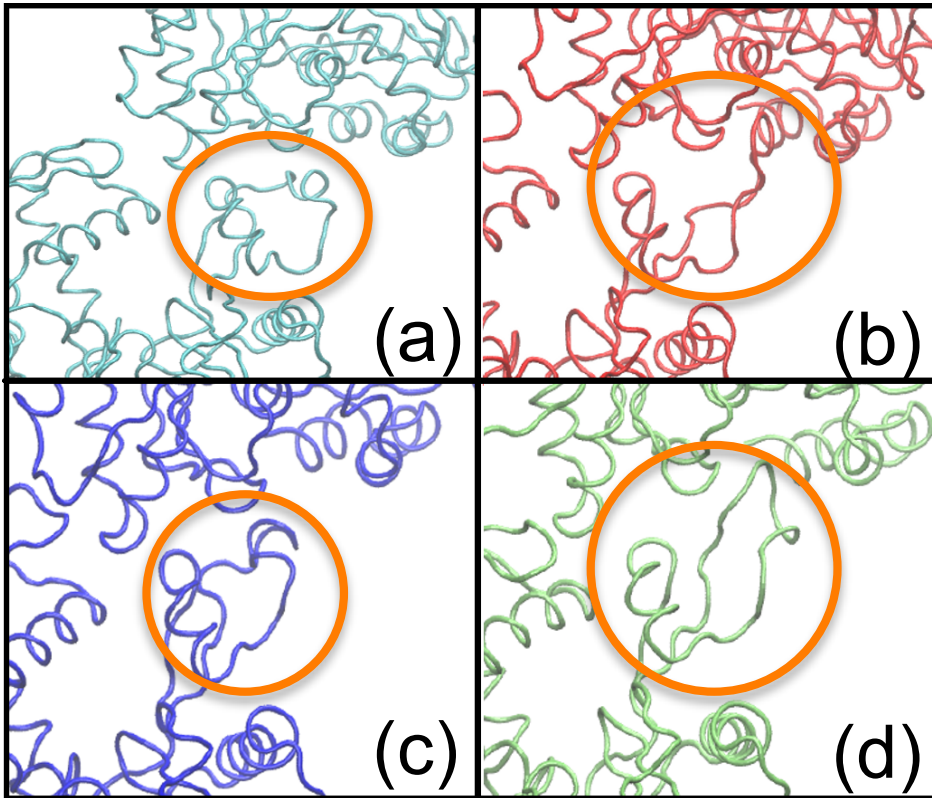

**Figure S2** Diagrammatic representation of the 13 six-site CG configurations of the (a) ATP-bound (b) ADP-bound filament and the averaged six-site CG model superimposed on the all-atom backbone structure. The top row contains the 1<sup>st</sup> -5<sup>th</sup> subunits, the middle row contains subunits 6 -10, and bottom row contains subunits 11 -13 and the averaged model.

(a)

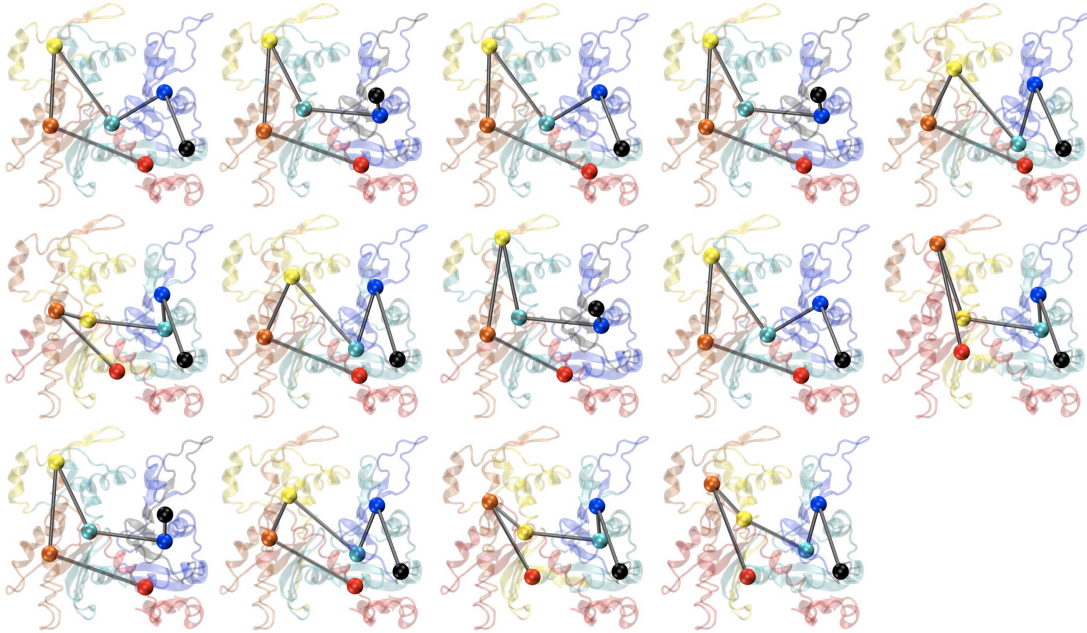

(b)

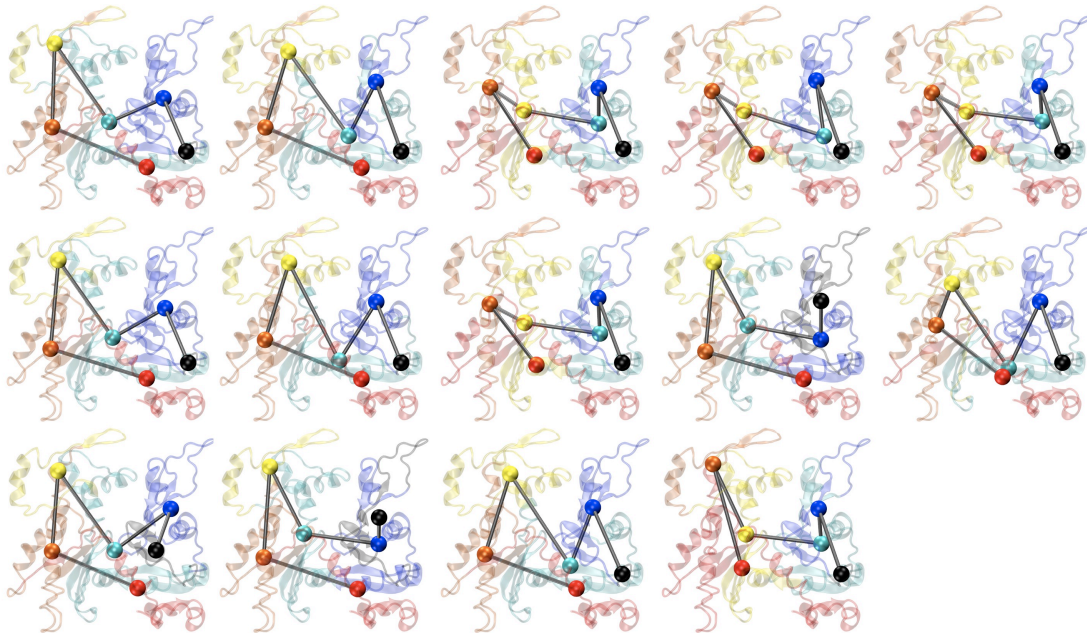

**Figure S3** Incorporating heterogeneity into CG models better reproduces (a) the persistence length and (b) torsional stiffness observed in MD simulations for ADP-bound filament.

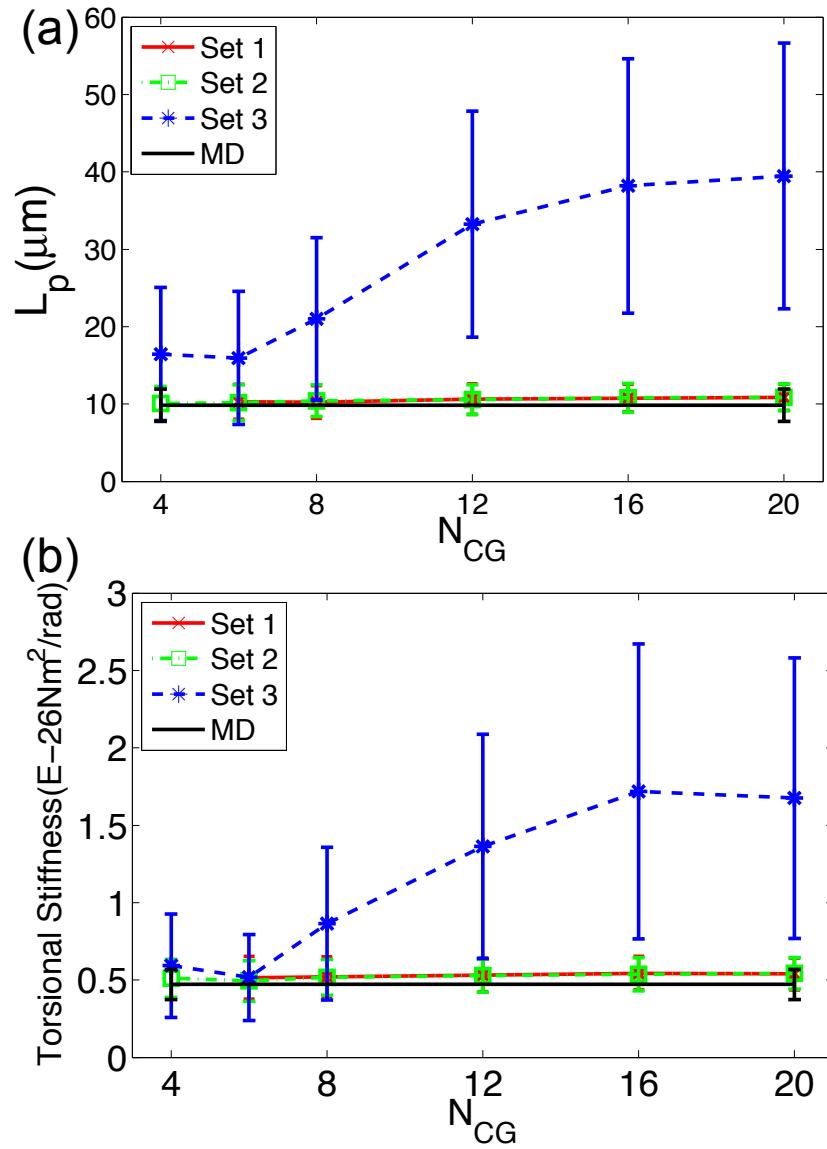



**Figure S4** Incorporating heterogeneity into CG models better represents (a) the twist per subunit and (b) its distribution observed in MD simulations for ADP-bound filament.

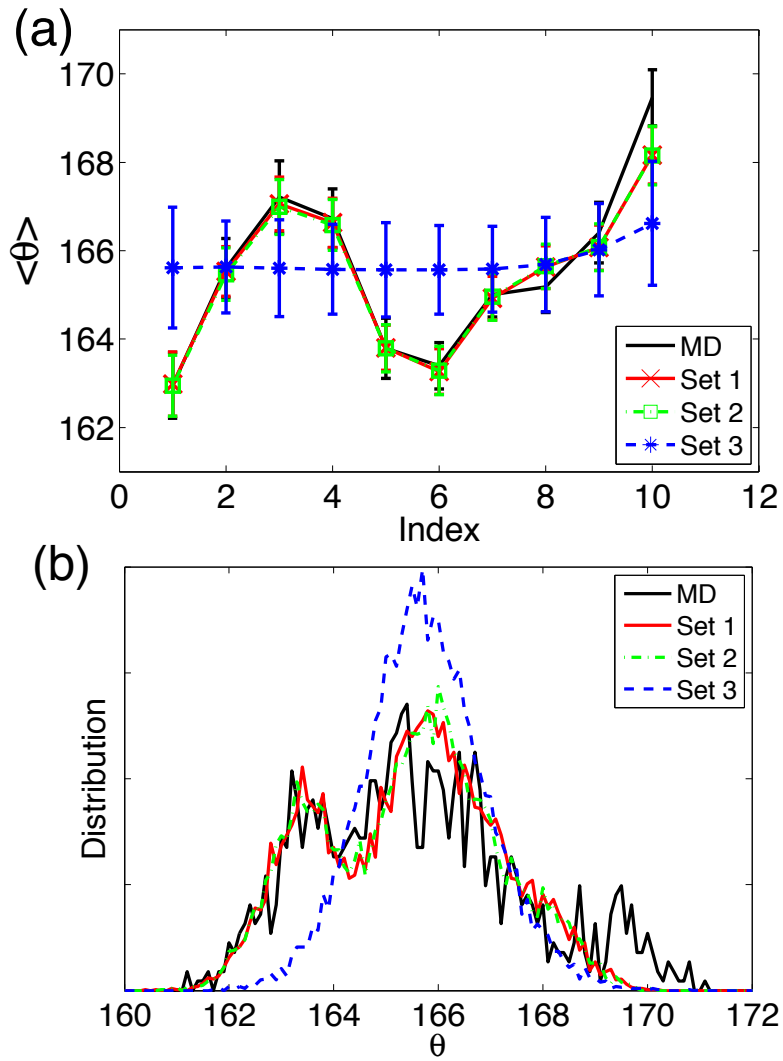

## References:

1. Amadei, A., A. B. M. Linssen, and H. J. C. Berendsen. 1993. Essential Dynamics of Proteins. *Proteins-Structure Function and Genetics* 17:412-425.
2. Brooks, B. R., R. E. Bruccoleri, B. D. Olafson, D. J. States, S. Swaminathan, and M. Karplus. 1983. Charmm - a Program for Macromolecular Energy, Minimization, and Dynamics Calculations. *J Comput Chem* 4:187-217.
3. McQuarrie, D. A. 1973. *Statistical thermodynamics*. Harper & Row, New York.
